# Supplementary material for: Genetics of adaptation in modern chicken
Source: PLoS Genet. 2019 Apr 29;15(4):e1007989. doi: 10.1371/journal.pgen.1007989 (PMC6508745; doi:10.1371/journal.pgen.1007989)
Supplement: S15 Table — (XLSX) [file pgen.1007989.s015.xlsx]

## Sheet: dRJFsComs_Top7_GeneList
Chr_Pos	Ref	Alt	Annotation	Gene	Substitution
1_442655	T	C	missense_variant	PAX4	c.205T>C
1_463428	G	C	missense_variant	LOC107055071	c.15C>G
1_463430	T	C	missense_variant	LOC107055071	c.13A>G
1_1661600	G	C	missense_variant	LOC101749355	c.412G>C
1_1661602	C	G	missense_variant	LOC101749355	c.414C>G
1_2060362	A	G	missense_variant	LOC107054228	c.709T>C
1_37793103	A	G	missense_variant	GLIPR1	c.340A>G
1_39829485	G	A	missense_variant	OTOGL	c.5524G>A
1_44904078	C	T	missense_variant	LOC107052933	c.169G>A
1_51579315	C	G	missense_variant	LOC101750812	c.1913G>C
1_51606155	T	C	missense_variant	CSF2RB	c.220A>G
1_53682236	G	A	missense_variant	MTERF2	c.421G>A
1_56971293	G	A	missense_variant	LOC100858131	c.247C>T
1_61707720	A	C	missense_variant	CECR6	c.101T>G
1_79384951	T	C	missense_variant	CTC1	c.1804A>G
1_79467217	A	C	missense_variant	POLQ	c.6665A>C
1_79467250	C	T	missense_variant	POLQ	c.6698C>T
1_140091086	G	C	missense_variant	LOC771176	c.1482G>C
1_163981265	C	T	missense_variant	LOC107051640	c.641C>T
1_169114790	A	G	missense_variant	MLNR	c.484A>G
1_170096402	T	C	missense_variant	SERPINE3	c.1400T>C
1_194205356	C	T	missense_variant	ART7C	c.41C>T
1_194854664	T	C	missense_variant	LOC101750398	c.64T>C
10_728005	G	C	missense_variant	LOC101748538	c.950G>C
10_2274221	C	T	missense_variant	MUC1	c.2089G>A
10_5978954	A	G	missense_variant	TJP1	c.2932T>C
10_6337216	C	G	missense_variant	LOC107052128	c.1121C>G
10_8317965	C	A	missense_variant	WDR72	c.1232C>A
10_9131482	G	C	missense_variant	AP4E1	c.1616G>C
10_10337457	C	T	missense_variant	LOC101749273	c.301G>A
10_10337466	T	C	missense_variant	LOC101749273	c.292A>G
10_12307024	G	A	missense_variant	LOC415478	c.3758C>T
10_12832456	G	A	missense_variant&splice_region_variant	KIF7	c.2320G>A
10_12970785	A	G	missense_variant	FANCI	c.953T>C
11_495159	A	C	missense_variant	USB1	c.819T>G
11_527614	C	T	missense_variant	KIFC3	c.167C>T
11_602124	G	A	missense_variant	DOK4	c.25G>A
11_602142	C	A	missense_variant	DOK4	c.43C>A
11_602158	G	A	missense_variant	DOK4	c.59G>A
11_1254494	G	T	missense_variant	CLEC18A	c.70C>A
11_1678825	C	G	missense_variant	HYDIN	c.5921C>G
11_9091072	G	A	missense_variant	ZNF536	c.4087G>A
12_2398819	T	C	missense_variant	CDHR4	c.1909A>G
12_3127843	A	G	missense_variant	ABHD14A	c.530T>C
12_3203881	A	G	missense_variant	GNAI2	c.38T>C
12_3203906	G	C	missense_variant	GNAI2	c.13C>G
12_3500225	C	T	missense_variant	LOC100857321	c.278C>T
13_3455739	A	T	missense_variant	RANBP17	c.521T>A
13_3949551	T	C	missense_variant	FOXI1	c.709A>G
13_3950994	C	T	missense_variant	FOXI1	c.301G>A
13_13268898	T	G	missense_variant	PDGFRB	c.3078T>G
14_4943325	T	C	missense_variant	SREBF1	c.361A>G
14_6926348	A	G	missense_variant	PALB2	c.2078T>C
14_6928479	G	A	missense_variant	PALB2	c.181C>T
14_11859726	A	G	missense_variant	IL20RB	c.424A>G
14_13668413	T	C	missense_variant	LOC107054653	c.746T>C
14_13668439	A	G	missense_variant	LOC107054653	c.772A>G
14_13668440	G	A	missense_variant	LOC107054653	c.773G>A
14_13668446	A	G	missense_variant	LOC107054653	c.779A>G
14_13668458	C	G	missense_variant	LOC107054653	c.791C>G
14_13668464	G	A	missense_variant	LOC107054653	c.797G>A
14_13668485	G	A	missense_variant	LOC107054653	c.818G>A
14_13668505	A	G	missense_variant	LOC107054653	c.838A>G
14_13668530	T	C	missense_variant	LOC107054653	c.863T>C
14_13668533	A	C	missense_variant	LOC107054653	c.866A>C
14_13689889	C	T	missense_variant	LOC107054658	c.107C>T
14_14289869	G	C	missense_variant	CCNF	c.42G>C
14_14289877	G	C	missense_variant	CCNF	c.50G>C
14_14289882	G	A	missense_variant	CCNF	c.55G>A
14_14296774	A	G	missense_variant	CCNF	c.1149A>G
14_14296806	A	C	missense_variant	CCNF	c.1181A>C
14_14297351	A	C	missense_variant	CCNF	c.1300A>C
14_14299501	A	G	missense_variant	CCNF	c.1948A>G
14_14299502	C	T	missense_variant	CCNF	c.1949C>T
14_14299516	C	G	missense_variant	CCNF	c.1963C>G
14_14323531	G	A	missense_variant	LOC107054659	c.284C>T
14_14323538	T	C	missense_variant	LOC107054659	c.277A>G
14_14323540	G	A	missense_variant	LOC107054659	c.275C>T
14_14323549	C	A	missense_variant	LOC107054659	c.266G>T
14_14323559	A	G	missense_variant	LOC107054659	c.256T>C
14_14323580	C	T	missense_variant	LOC107054659	c.235G>A
14_14323618	G	C	missense_variant	LOC107054659	c.197C>G
15_8418626	G	C	missense_variant	GGT5	c.1738G>C
15_9338152	A	G	missense_variant	AL021546.6	c.124T>C
16_340963	A	C	missense_variant	LOC101748132	c.371T>G
16_341107	C	T	missense_variant	LOC101748132	c.227G>A
16_588901	C	G	missense_variant	LOC429800	c.877G>C
17_2955573	G	A	missense_variant	AKNA	c.2501C>T
17_6538740	G	A	missense_variant	LAMC3	c.2908G>A
17_8473649	C	A	missense_variant	LOC417131	c.814C>A
17_8473650	C	T	missense_variant	LOC417131	c.815C>T
19_2625030	G	C	missense_variant	WBSCR16	c.49C>G
19_2625047	T	C	missense_variant	WBSCR16	c.32A>G
2_413262	C	G	missense_variant	SSPO	c.2673C>G
2_435295	A	G	missense_variant&splice_region_variant	SSPO	c.12523A>G
2_984080	A	C	missense_variant	LOC101751647	c.442A>C
2_984083	G	T	missense_variant	LOC101751647	c.445G>T
2_984086	T	C	missense_variant	LOC101751647	c.448T>C
2_2267510	T	C	missense_variant	OBSCN	c.3263A>G
2_26709715	T	C	missense_variant	VWDE	c.2825A>G
2_34098635	G	A	missense_variant	BTD	c.1091G>A
2_41931122	A	G	missense_variant	LOC776146	c.362T>C
2_41931144	C	T	missense_variant	LOC776146	c.340G>A
2_50876521	T	C	missense_variant	GLI3	c.4124A>G
2_55288422	G	A	missense_variant	TNS3	c.2567C>T
2_55307738	A	T	missense_variant	TNS3	c.1266T>A
2_80050551	G	A	missense_variant	NSUN2	c.2335G>A
2_80050555	A	G	missense_variant	NSUN2	c.2339A>G
2_97286713	T	C	missense_variant	CEP76	c.1562T>C
2_98307775	G	A	missense_variant	MOG	c.38C>T
2_111554876	T	C	missense_variant	KIF20AL	c.230A>G
2_117205187	G	A	missense_variant	XKR9	c.976G>A
20_10382076	C	G	missense_variant	C20H20ORF112	c.1452G>C
20_10501971	C	T	missense_variant	BPIFB2	c.331G>A
20_10549709	C	G	missense_variant	BPI	c.16G>C
20_10796176	T	G	missense_variant	SLC12A5	c.1492T>G
21_2709425	T	G	missense_variant	AGRN	c.5497A>C
22_3543202	G	A	missense_variant	ADD2	c.1969G>A
23_1432870	G	C	missense_variant	LOC419563	c.128G>C
23_1966512	G	A	missense_variant	MAP3K6	c.203C>T
23_3536164	G	A	missense_variant	INPP5B	c.122G>A
24_6135243	A	C	missense_variant	TEX12	c.158T>G
24_6139807	T	G	missense_variant	IL18	c.205T>G
24_6148344	C	T	missense_variant	AP002884.2	c.86G>A
24_6155622	A	G	missense_variant	PIH1D2	c.785A>G
25_1128366	T	C	missense_variant	LOC107055096	c.1153A>G
25_1129560	C	T	missense_variant	LOC107055096	c.133G>A
25_1160317	T	C	missense_variant	LOC101751222	c.200T>C
25_1385854	T	C	missense_variant	PEAR1	c.1535A>G
25_1713369	A	G	missense_variant	IL6RA	c.1069A>G
25_2519693	T	C	missense_variant	IGSF9	c.3091T>C
25_2728225	G	A	missense_variant	RFX5	c.1523C>T
26_1599643	G	A	missense_variant	LOC100859805	c.4907G>A
27_650892	C	T	missense_variant	LOC100859830	c.176C>T
27_951163	T	C	missense_variant	LOC107055263	c.47T>C
27_951210	C	A	missense_variant	LOC107055263	c.94C>A
27_951211	C	A	missense_variant	LOC107055263	c.95C>A
27_4310219	C	T	missense_variant	SRCIN1	c.379G>A
27_4425742	T	C	missense_variant	PCGF2	c.16A>G
28_1384560	C	T	missense_variant	TRIM54	c.142G>A
28_1902537	T	C	missense_variant	LOC107055341	c.232A>G
28_2160596	T	G	missense_variant	CSNK1G2	c.780A>C
28_2801136	T	C	missense_variant	LOC101750583	c.571A>G
28_3057473	C	T	missense_variant	LOC100858130	c.1049G>A
28_3239942	G	C	missense_variant	APC2	c.5867G>C
28_3342489	A	G	missense_variant	JAK3	c.1976T>C
28_3995042	C	T	missense_variant	LOC107055358	c.452C>T
28_4035371	T	C	missense_variant	MAST3	c.4141A>G
3_10946400	A	T	missense_variant	ETAA1	c.1980A>T
3_11369463	G	A	missense_variant	FBXO48	c.56C>T
3_13618147	T	C	missense_variant	MKKS	c.899T>C
3_16423085	T	C	missense_variant	NINL	c.151A>G
3_16423130	C	T	missense_variant	NINL	c.106G>A
3_47094671	A	C	missense_variant	ADGB	c.3562A>C
3_63948631	A	C	missense_variant	KPNA5	c.176T>G
3_102190503	T	C	missense_variant	LOC107053164	c.644A>G
4_1632819	G	A	missense_variant	UTP14A	c.1427C>T
4_9335934	C	T	missense_variant	LOC101750517	c.127G>A
4_21641053	G	T	missense_variant	GRIA2	c.1981G>T
4_39113852	C	G	missense_variant	TET2	c.79G>C
4_67124162	T	A	missense_variant&splice_region_variant	CORIN	c.1066T>A
4_86364911	C	T	missense_variant	LOC100857871	c.121G>A
4_86439444	A	G	missense_variant	LOC100858172	c.133T>C
4_90297740	G	A	missense_variant	GNOT1	c.104C>T
5_1564972	T	C	missense_variant&splice_region_variant	ATHL1	c.1054A>G
5_16878466	G	C	missense_variant	LOC101748887	c.645G>C
5_18392481	T	G	missense_variant	FBXO3	c.467A>C
5_30634749	A	T	missense_variant&splice_region_variant	ARHGAP11A	c.856T>A
5_36041088	C	A	missense_variant	BAZ1A	c.754G>T
5_38908599	T	C	missense_variant	VASH1	c.52T>C
5_50691567	G	A	missense_variant	TDRD9	c.2755G>A
5_51905367	A	G	missense_variant	AHNAK2	c.2435T>C
5_53989579	T	C	missense_variant	LOC101752204	c.280T>C
5_53989595	T	C	missense_variant	LOC101752204	c.296T>C
5_53990098	C	T	missense_variant	LOC101752204	c.799C>T
5_55326970	A	G	missense_variant	KIAA0586	c.1886T>C
5_55338110	C	T	missense_variant	KIAA0586	c.263G>A
5_57017204	G	C	missense_variant	LOC107053608	c.178G>C
6_15933301	A	G	missense_variant	FUT11	c.98T>C
6_19372342	G	T	missense_variant	SLC16A12	c.382C>A
6_22060849	A	C	missense_variant	DNMBP	c.2477A>C
6_22416270	A	C	missense_variant	C10ORF12	c.3787T>G
6_27455280	T	C	missense_variant	HABP2	c.11T>C
6_27779977	A	G	missense_variant	AFAP1L2	c.2422T>C
6_27780822	G	A	missense_variant	AFAP1L2	c.2144C>T
6_27780873	G	A	missense_variant	AFAP1L2	c.2093C>T
6_32623595	T	C	missense_variant	ADAM12	c.2674A>G
7_5805380	G	C	missense_variant	LOC424028	c.1001C>G
7_5807693	T	G	missense_variant	LOC424028	c.676A>C
7_5829437	A	C	missense_variant	LOC424028	c.306T>G
7_5829450	C	G	missense_variant	LOC424028	c.293G>C
7_21945605	C	T	missense_variant	PLA2R1	c.155C>T
7_21950233	G	A	missense_variant	PLA2R1	c.853G>A
7_21950303	T	C	missense_variant	PLA2R1	c.923T>C
7_21950949	C	A	missense_variant	PLA2R1	c.1084C>A
7_21952902	A	G	missense_variant	PLA2R1	c.1402A>G
7_26703061	A	G	missense_variant	SEMA5B	c.3379T>C
8_6244639	A	G	missense_variant	ABL2	c.730A>G
8_6244641	C	G	missense_variant	ABL2	c.732C>G
8_6778118	G	A	missense_variant	ASTN1	c.3158G>A
8_13795358	A	G	missense_variant	DNTTIP2	c.1135A>G
8_14477778	G	T	missense_variant	TGFBR3	c.1143G>T
8_16424711	C	G	missense_variant	WDR63	c.677G>C
9_3542599	C	T	missense_variant	EHHADH	c.2119G>A
9_4110236	C	A	missense_variant	LOC424872	c.319C>A
9_4746761	C	T	missense_variant	NEU4	c.1033G>A
9_7968667	A	G	missense_variant	SGPP2	c.127A>G
9_10474850	A	G	missense_variant	ATR	c.7667T>C
9_10621461	C	G	missense_variant	PAQR9	c.40G>C
9_11532334	T	A	missense_variant	PLOD2	c.1127A>T
9_15022456	A	G	missense_variant	MUC4	c.2780A>G
9_15988690	T	C	missense_variant	CHRD	c.458A>G
9_23493128	T	A	missense_variant	MBNL1	c.602A>T
9_23493152	G	T	missense_variant	MBNL1	c.578C>A
9_23493170	A	T	missense_variant	MBNL1	c.560T>A
Z_1726494	C	G	missense_variant	SKOR2	c.1936C>G
Z_2012753	A	G	missense_variant	LOXHD1	c.5047A>G
Z_2143776	G	T	missense_variant	HAUS1	c.679C>A
Z_9012732	G	A	missense_variant	LOC100858919	c.1351G>A
Z_9059725	A	C	missense_variant&splice_region_variant	CD72	c.443T>G
Z_9095428	T	G	missense_variant	SPAG8	c.154T>G
Z_9095440	C	T	missense_variant	SPAG8	c.166C>T
Z_9095443	A	G	missense_variant	SPAG8	c.169A>G
Z_9095498	A	C	missense_variant	SPAG8	c.224A>C
Z_9095516	T	G	missense_variant	SPAG8	c.242T>G
Z_10301888	C	T	missense_variant	ADAMTS12	c.469G>A
Z_10302100	G	A	missense_variant	ADAMTS12	c.257C>T
Z_10819221	G	A	missense_variant	SPEF2	c.2324G>A
Z_10849263	G	A	missense_variant	LOC107051889	c.211G>A
Z_16761767	C	G	missense_variant	SKIV2L2	c.109C>G
Z_17107514	T	C	missense_variant	ANKRD55	c.969A>G
Z_17514878	G	A	missense_variant	LOC107051891	c.689C>T
Z_17514921	C	T	missense_variant	LOC107051891	c.646G>A
Z_17515023	A	T	missense_variant	LOC107051891	c.544T>A
Z_17515160	T	C	missense_variant	LOC107051891	c.407A>G
Z_17515364	G	A	missense_variant	LOC107051891	c.203C>T
Z_31707483	C	G	missense_variant	CER1	c.675G>C
Z_31750080	C	G	missense_variant	FREM1	c.3546G>C
Z_31753164	A	G	missense_variant	FREM1	c.3011T>C
Z_34341632	C	G	missense_variant	LOC101750973	c.220G>C
Z_34440741	A	G	missense_variant	RFK	c.677T>C
Z_35871089	G	A	missense_variant	TMC1	c.2612G>A
Z_35871133	G	A	missense_variant	TMC1	c.2656G>A
Z_37335926	C	T	missense_variant	LOC427259	c.25G>A
Z_37363265	G	A	missense_variant	GCNT1	c.830G>A
Z_40175815	T	C	missense_variant	SLC28A3	c.931A>G
Z_40189107	T	C	missense_variant	SLC28A3	c.112A>G
Z_41513571	T	A	missense_variant	CZH9ORF3	c.1094T>A
Z_44347746	A	G	missense_variant	NFIL3	c.685T>C
Z_63742278	C	G	missense_variant	ZCCHC9	c.176G>C
Z_68082039	G	C	missense_variant	LOC107052379	c.783C>G
Z_68206170	A	G	missense_variant&splice_region_variant	LOC427362	c.170A>G
Z_68529149	C	T	missense_variant	LRRC19	c.757G>A
Z_72842371	T	A	missense_variant	LVRN	c.2683A>T
Z_78778797	C	T	missense_variant	TRIM36	c.196G>A
Z_78822725	T	C	missense_variant	CCDC112	c.605A>G
Z_78823440	A	T	missense_variant	CCDC112	c.431T>A
Z_81123635	G	C	missense_variant	SNCAIP	c.1134G>C
Z_81360050	C	A	missense_variant	PPIC	c.11G>T
Z_81572268	G	A	missense_variant	FRMPD1	c.3649G>A
Z_81764994	A	G	missense_variant	ZCCHC7	c.188T>C
Z_81986145	C	T	missense_variant	MELK	c.1312G>A
